# Supplementary material for: The UCLA ATLAS Community Health Initiative: promoting precision health research in a diverse biobank
Source: bioRxiv or medRxiv preprint supplement (doi:10.1101/2022.02.12.22270895), 2022-02-14

## Supplementary Figure S4

**Summary of GWAS across 7 traits and 4 ancestry groups.** We provide Manhattan plots and QQ-plots for each GWAS. The red horizontal line in the Manhattan plots denotes genome-wide significance ( $p$ -value  $< 5e-8$ ). SNPs that reach genome-wide significance are shaded in dark blue on the QQ-plot. We also provide the number of SNPs that have non-NA  $p$ -values, the number of SNPs that reach nominal ( $p$ -value  $< 0.05$ ) and genome-wide significance.

## Supplementary Figure S5A: Asthma, EUR

**Cases vs. Controls:** 3051, 13590  
**Number of SNPs:** 6859892  
**Number of significant SNPs ( $5e-8$ ):** 0  
**Number of nominally significant SNPs (0.05):** 340303  
**Lambda GC:** 0.99

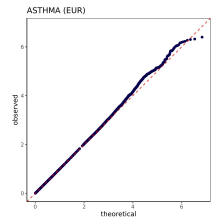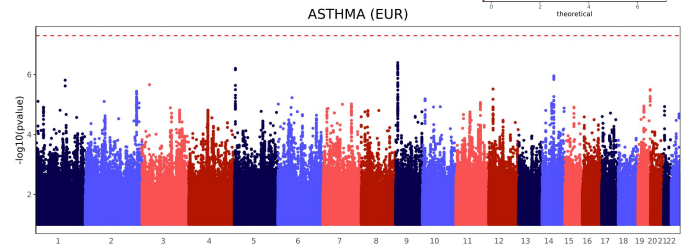

## Supplementary Figure S5B: Asthma, AFR

**Cases vs. Controls:** 289, 937  
**Number of SNPs:** 6557250  
**Number of significant SNPs ( $5e-8$ ):** 1  
**Number of nominally significant SNPs (0.05):** 319378  
**Lambda GC:** 0.99

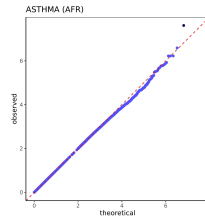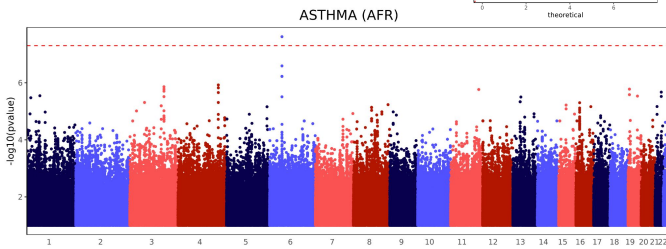

## Supplementary Figure S5C: Asthma, AMR

**Cases vs. Controls:** 760, 3615  
**Number of SNPs:** 7055126  
**Number of significant SNPs ( $5e-8$ ):** 0  
**Number of nominally significant SNPs (0.05):** 341269  
**Lambda GC:** 0.97

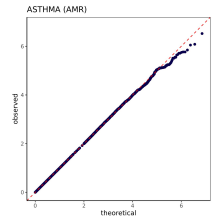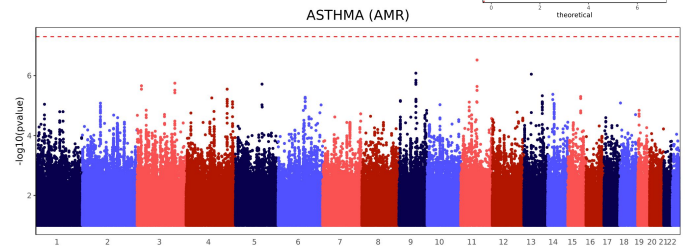

## Supplementary Figure S5D: Asthma, EAS

**Cases vs. Controls:** 308, 1992  
**Number of SNPs:** 5396472  
**Number of significant SNPs ( $5e-8$ ):** 0  
**Number of nominally significant SNPs (0.05):** 262955  
**Lambda GC:** 0.98

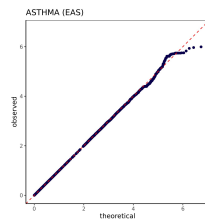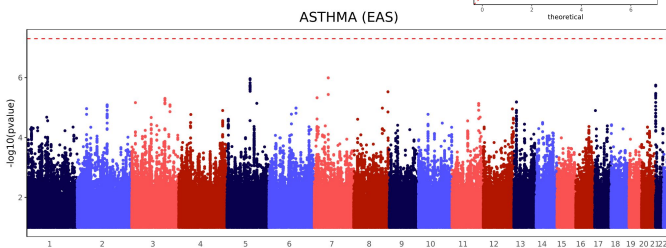

## Supplementary Figure S5E: COPD, EUR

**Cases vs. Controls:** 2005, 14636  
**Number of SNPs:** 6850600  
**Number of significant SNPs ( $5e-8$ ):** 0  
**Number of nominally significant SNPs (0.05):** 339124  
**Lambda GC:** 0.99

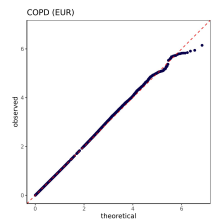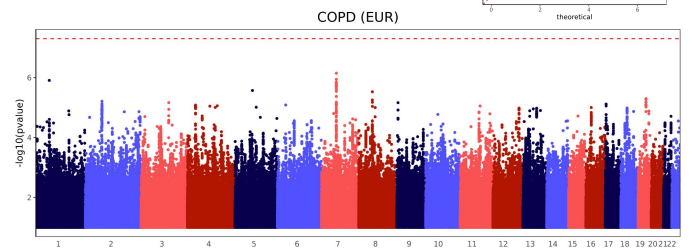

**Supplementary Figure S5F: COPD, AFR**

Cases vs. Controls: 187, 1039  
 Number of SNPs: 6528611  
 Number of significant SNPs (5e-8): 0  
 Number of nominally significant SNPs (0.05): 315167  
 Lambda GC: 0.98

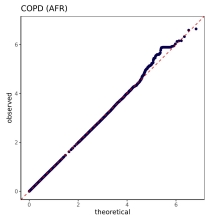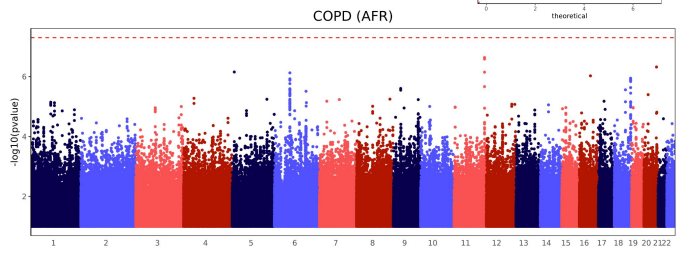

**Supplementary Figure S5G: COPD, AMR**

Cases vs. Controls: 384, 3991  
 Number of SNPs: 7014983  
 Number of significant SNPs (5e-8): 0  
 Number of nominally significant SNPs (0.05): 334510  
 Lambda GC: 0.96

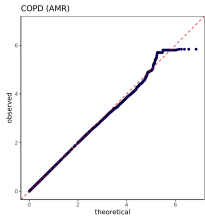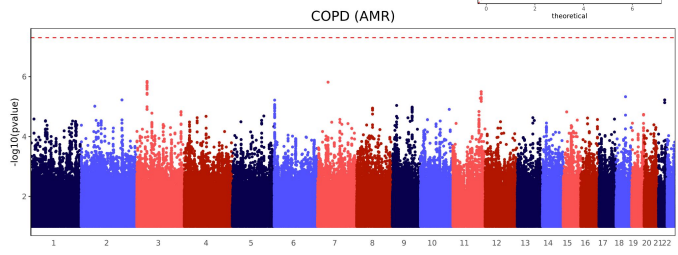

**Supplementary Figure S5H: COPD, EAS**

Cases vs. Controls: 208, 2092  
 Number of SNPs: 5367966  
 Number of significant SNPs (5e-8): 0  
 Number of nominally significant SNPs (0.05): 260451  
 Lambda GC: 0.99

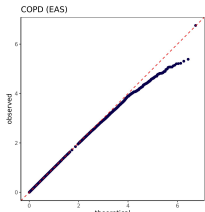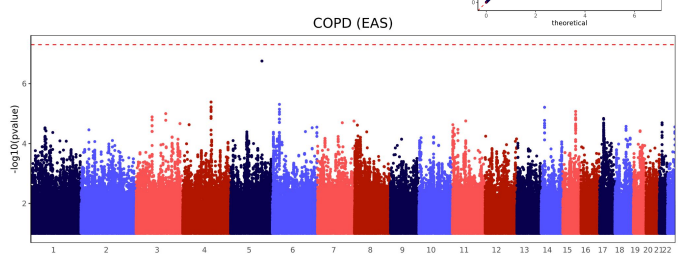

**Supplementary Figure S5I: GOUT, EUR**

Cases vs. Controls: 810, 15831  
 Number of SNPs: 6824341  
 Number of significant SNPs (5e-8): 20  
 Number of nominally significant SNPs (0.05): 332499  
 Lambda GC: 0.98

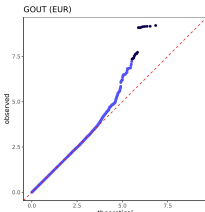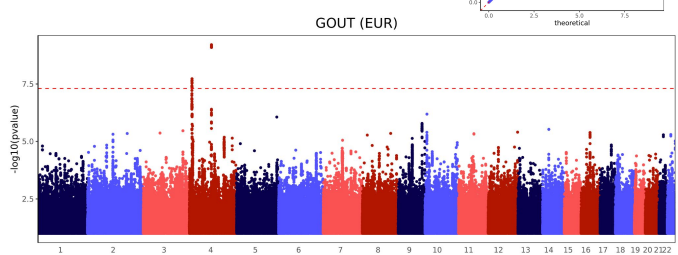

**Supplementary Figure S5J: GOUT, AFR**

Cases vs. Controls: 105, 1121  
 Number of SNPs: 6428878  
 Number of significant SNPs (5e-8): 0  
 Number of nominally significant SNPs (0.05): 311707  
 Lambda GC: 0.98

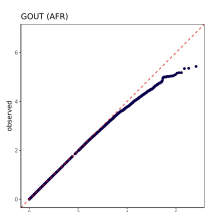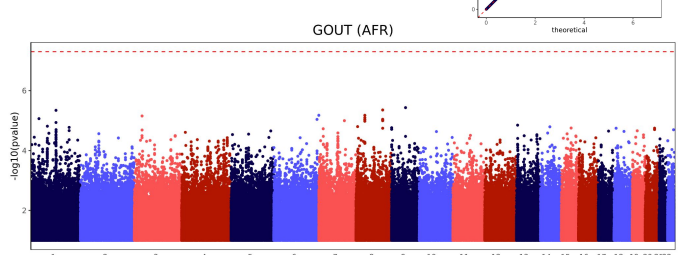

**Supplementary Figure S5K: GOUT, AMR**

Cases vs. Controls: 179, 4196  
 Number of SNPs: 6946694  
 Number of significant SNPs (5e-8): 3  
 Number of nominally significant SNPs (0.05): 327952  
 Lambda GC: 0.95

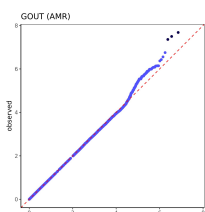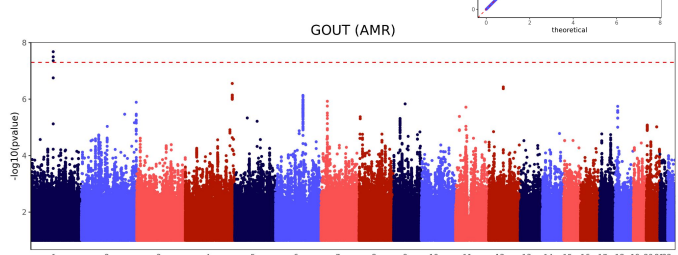

**Supplementary Figure S5L: GOUT, EAS**

Cases vs. Controls: 155, 2145  
 Number of SNPs: 5353230  
 Number of significant SNPs (5e-8): 0  
 Number of nominally significant SNPs (0.05): 259466  
 Lambda GC: 0.98

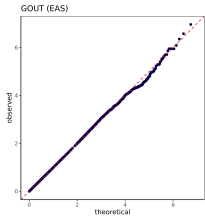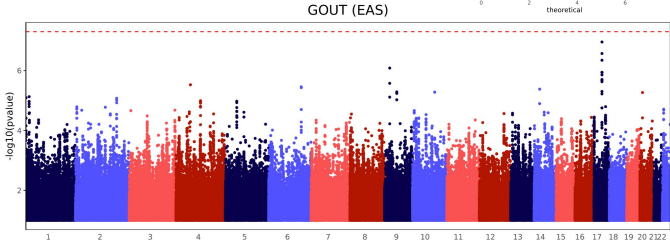

**Supplementary Figure S5M: HF, EUR**

Cases vs. Controls: 1301, 15340  
 Number of SNPs: 6835981  
 Number of significant SNPs (5e-8): 1  
 Number of nominally significant SNPs (0.05): 331949  
 Lambda GC: 0.99

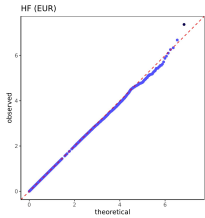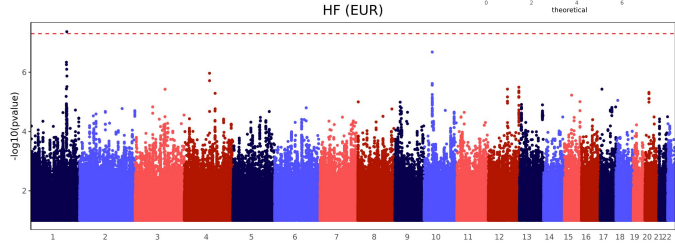

**Supplementary Figure S5N: HF, AFR**

Cases vs. Controls: 174, 1052  
 Number of SNPs: 6515405  
 Number of significant SNPs (5e-8): 0  
 Number of nominally significant SNPs (0.05): 314043  
 Lambda GC: 0.98

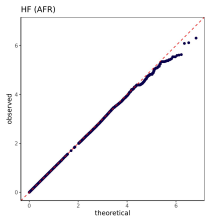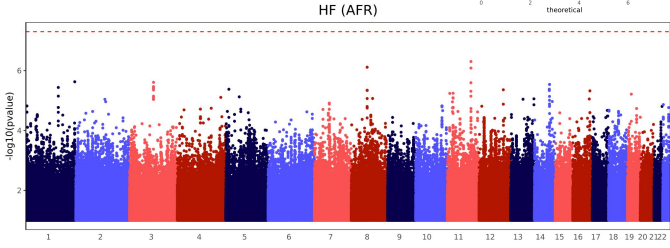

**Supplementary Figure S5O: HF, AMR**

Cases vs. Controls: 423, 3952  
 Number of SNPs: 6989341  
 Number of significant SNPs (5e-8): 0  
 Number of nominally significant SNPs (0.05): 332637  
 Lambda GC: 0.98

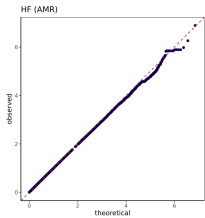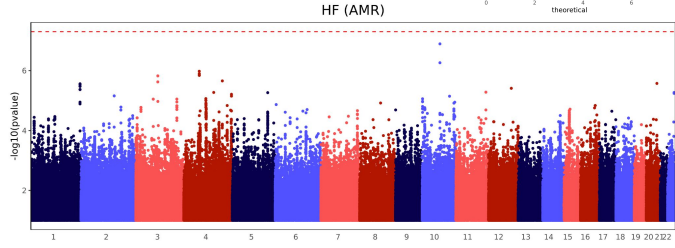

**Supplementary Figure S5P: HF, EAS**

Cases vs. Controls: 144, 2156  
 Number of SNPs: 5396283  
 Number of significant SNPs (5e-8): 0  
 Number of nominally significant SNPs (0.05): 259905  
 Lambda GC: 0.98

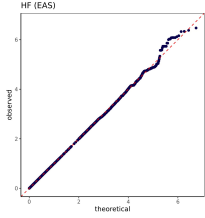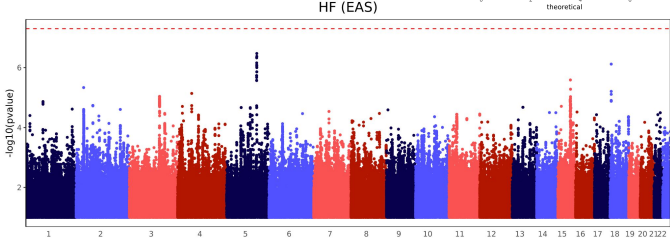

**Supplementary Figure S5Q: IPF, EUR**

Cases vs. Controls: 700, 15941  
 Number of SNPs: 6825652  
 Number of significant SNPs (5e-8): 2  
 Number of nominally significant SNPs (0.05): 327434  
 Lambda GC: 0.99

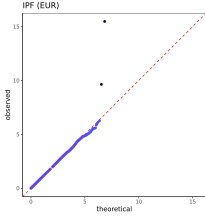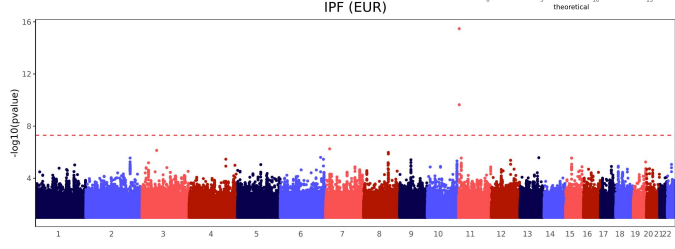

**Supplementary Figure S5R: IPF, AMR**

Cases vs. Controls: 204, 4171  
 Number of SNPs: 6842352  
 Number of significant SNPs (5e-8): 0  
 Number of nominally significant SNPs (0.05): 323123  
 Lambda GC: 0.96

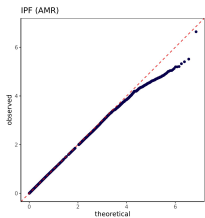

IPF (AMR)

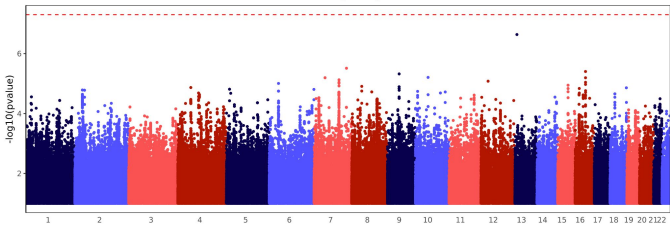

**Supplementary Figure S5S: IPF, AFR**

Cases vs. Controls: 76, 1150  
 Number of SNPs: 6445498  
 Number of significant SNPs (5e-8): 0  
 Number of nominally significant SNPs (0.05): 306734  
 Lambda GC: 0.96

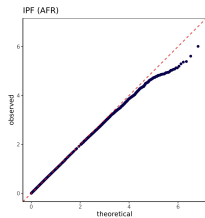

IPF (AFR)

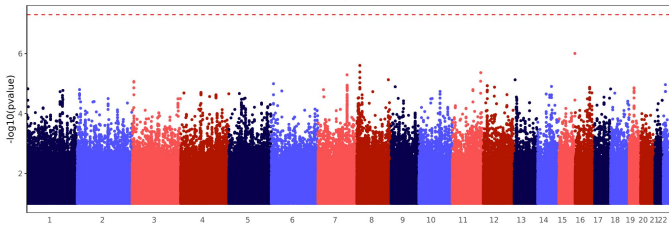

**Supplementary Figure S5T: IPF, EAS**

Cases vs. Controls: 89, 2211  
 Number of SNPs: 5362117  
 Number of significant SNPs (5e-8): 0  
 Number of nominally significant SNPs (0.05): 253124  
 Lambda GC: 0.97

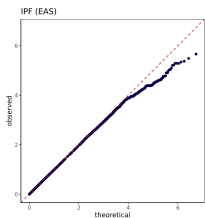

IPF (EAS)

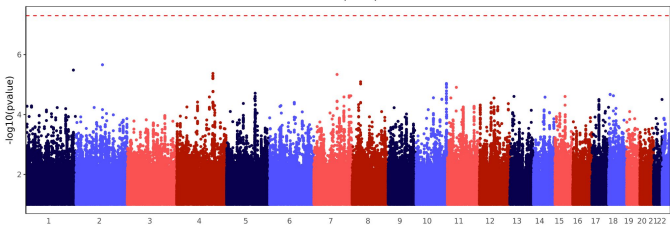

**Supplementary Figure S5U: STROKE, EUR**

Cases vs. Controls: 855, 15786  
 Number of SNPs: 6821487  
 Number of significant SNPs (5e-8): 0  
 Number of nominally significant SNPs (0.05): 327493  
 Lambda GC: 0.98

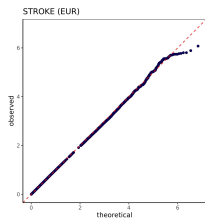

STROKE (EUR)

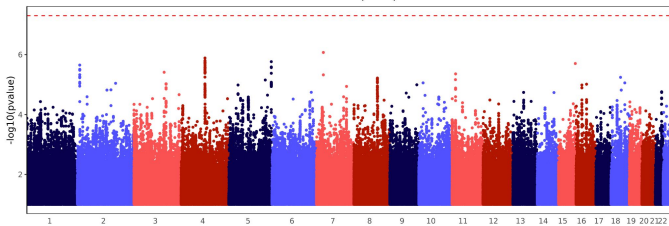

**Supplementary Figure S5V: STROKE, AMR**

Cases vs. Controls: 248, 4127  
 Number of SNPs: 6989264  
 Number of significant SNPs (5e-8): 5  
 Number of nominally significant SNPs (0.05): 327754  
 Lambda GC: 0.96

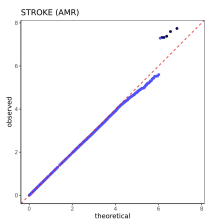

STROKE (AMR)

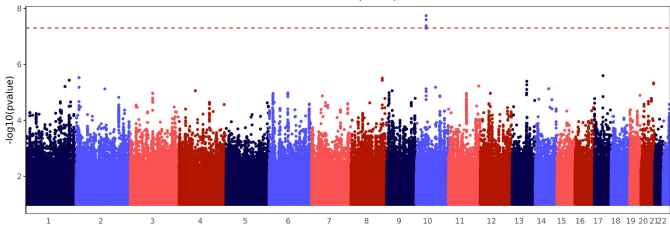

**Supplementary Figure S5W: STROKE, AFR**

Cases vs. Controls: 100, 1126  
 Number of SNPs: 6515249  
 Number of significant SNPs (5e-8): 0  
 Number of nominally significant SNPs (0.05): 314659  
 Lambda GC: 0.98

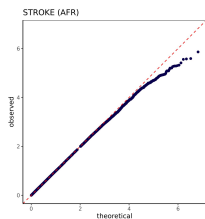

STROKE (AFR)

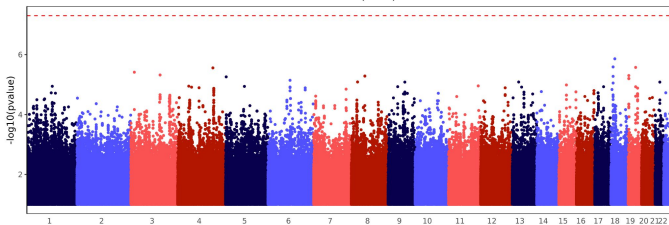

**Supplementary Figure S5X: STROKE, EAS**

Cases vs. Controls: 105, 2195  
 Number of SNPs: 5312992  
 Number of significant SNPs (5e-8): 0  
 Number of nominally significant SNPs (0.05): 250657  
 Lambda GC: 0.98

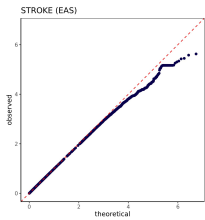

STROKE (EAS)

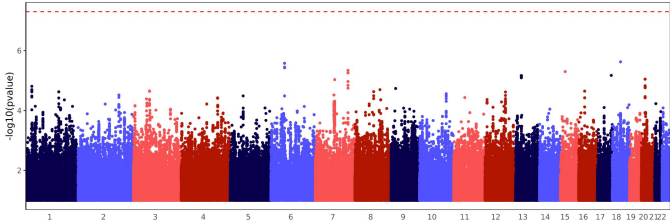

**Supplementary Figure S5Y: VTE, EUR**

Cases vs. Controls: 1503, 15138  
 Number of SNPs: 6838442  
 Number of significant SNPs (5e-8): 3  
 Number of nominally significant SNPs (0.05): 327404  
 Lambda GC: 0.98

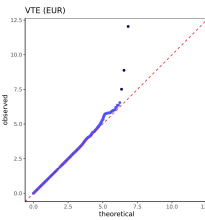

VTE (EUR)

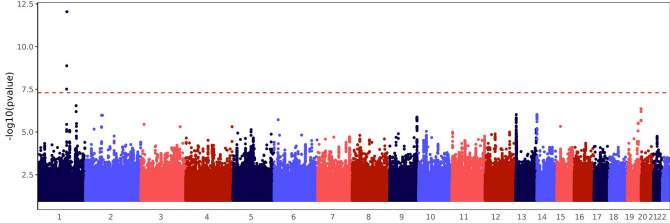

**Supplementary Figure S5Z: VTE, AMR**

Cases vs. Controls: 543, 3832  
 Number of SNPs: 7032980  
 Number of significant SNPs (5e-8): 0  
 Number of nominally significant SNPs (0.05): 338233  
 Lambda GC: 0.97

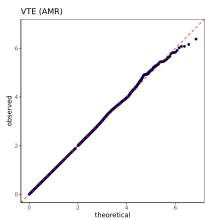

VTE (AMR)

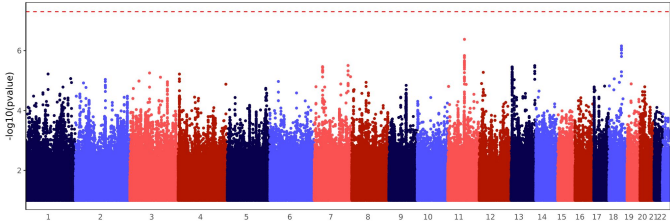

**Supplementary Figure S5AA: VTE, AFR**

Cases vs. Controls: 195, 1031  
 Number of SNPs: 6534467  
 Number of significant SNPs (5e-8): 0  
 Number of nominally significant SNPs (0.05): 311423  
 Lambda GC: 0.96

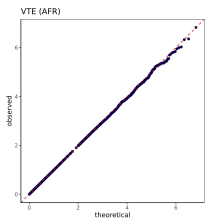

VTE (AFR)

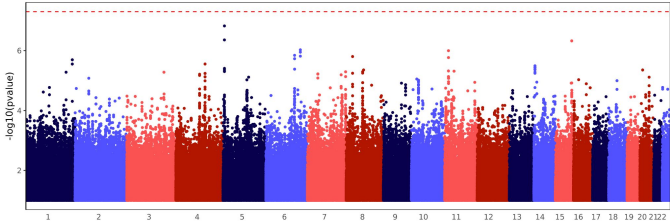

**Supplementary Figure S5AB: VTE, EAS**

Cases vs. Controls: 132, 2168  
 Number of SNPs: 5373808  
 Number of significant SNPs (5e-8): 0  
 Number of nominally significant SNPs (0.05): 251594  
 Lambda GC: 0.97

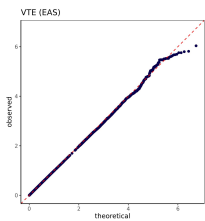

VTE (EAS)

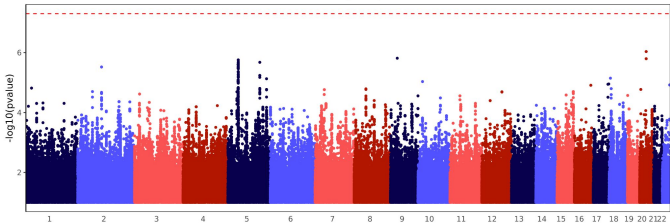

Supplement: Supplementary file [file media-2.pdf]
